# Supplementary material for: A facile, morphology-controlled synthesis of potassium-containing manganese oxide nanostructures for electrochemical supercapacitor application
Source: Royal Society of Chemistry journal article supplement (doi:10.1039/c4ra05227g), 2014-01-01
Supplement: c4ra05227g1.pdf [file c4ra05227g1.pdf]

## Supporting Data

### A facile, morphology-controlled synthesis of potassium-containing manganese oxide nanostructures for electrochemical supercapacitor application

Navaladian Subramanian, Balasubramanian Viswanathan\* and Thirukkallam K. Varadarajan

National Centre for Catalysis Research,  
Department of Chemistry,  
Indian Institute of Technology Madras,  
Chennai 600 036, India.  
Phone: +971 44 2257 4241  
E-mail: [bvnathan@iitm.ac.in](mailto:bvnathan@iitm.ac.in)

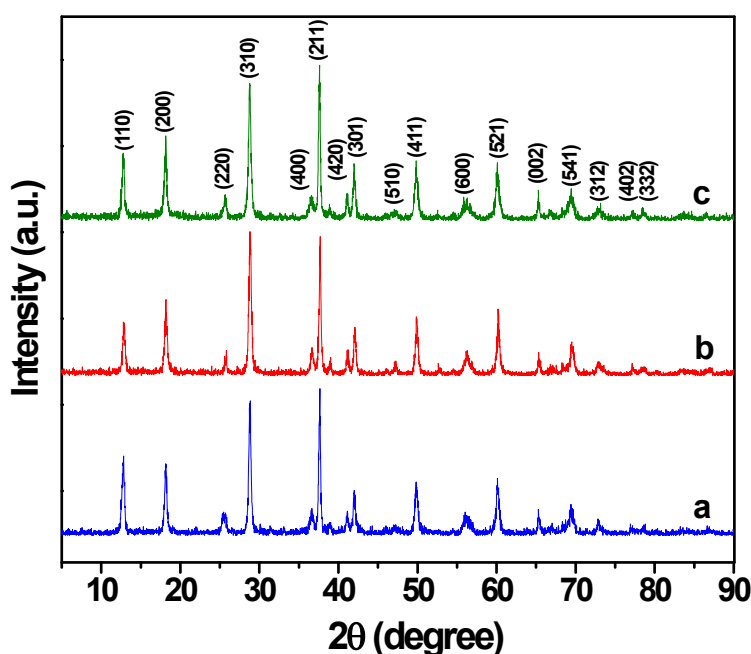

**Fig. S1** Powder XRD patterns (a, b and c) of cryptomelane samples (A, B and C) obtained by calcining birnessite samples at 800 °C for 2 h. All the XRD lines match the cryptomelane phase, proving the high thermal stability of cryptomelane samples synthesized by this method.

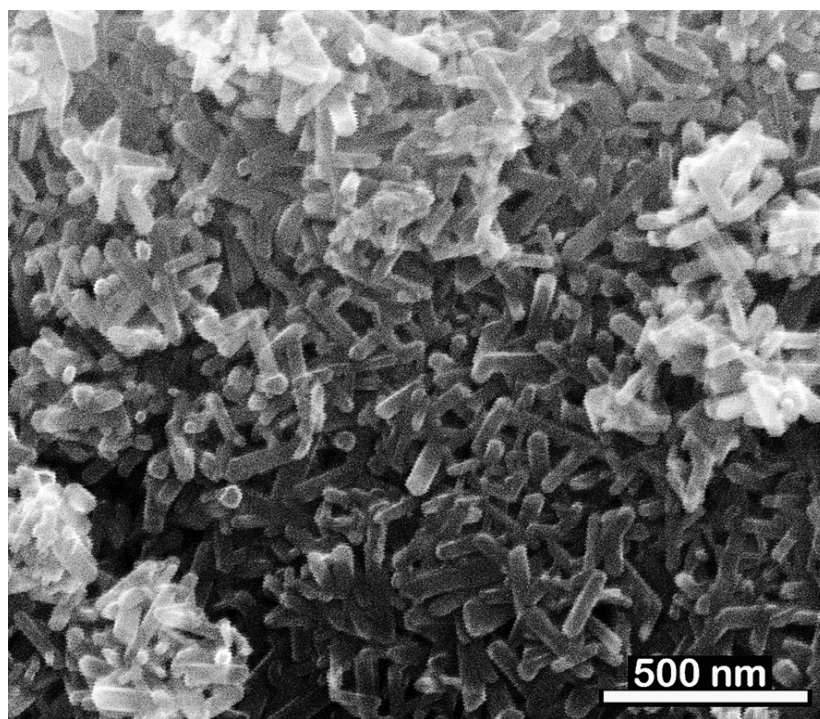

**Fig. S2** SEM image of Crypt-C600

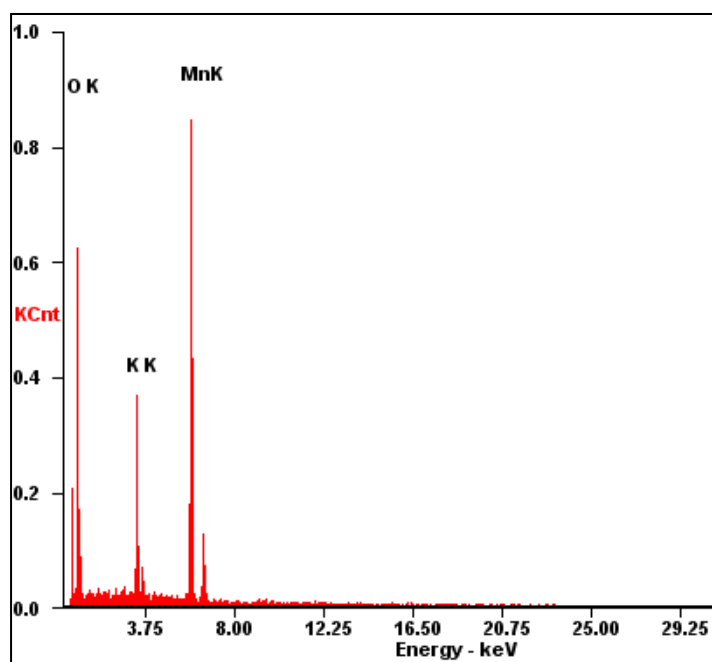

**Fig. S3** EDS of Crypt-C600 recorded during SEM analysis

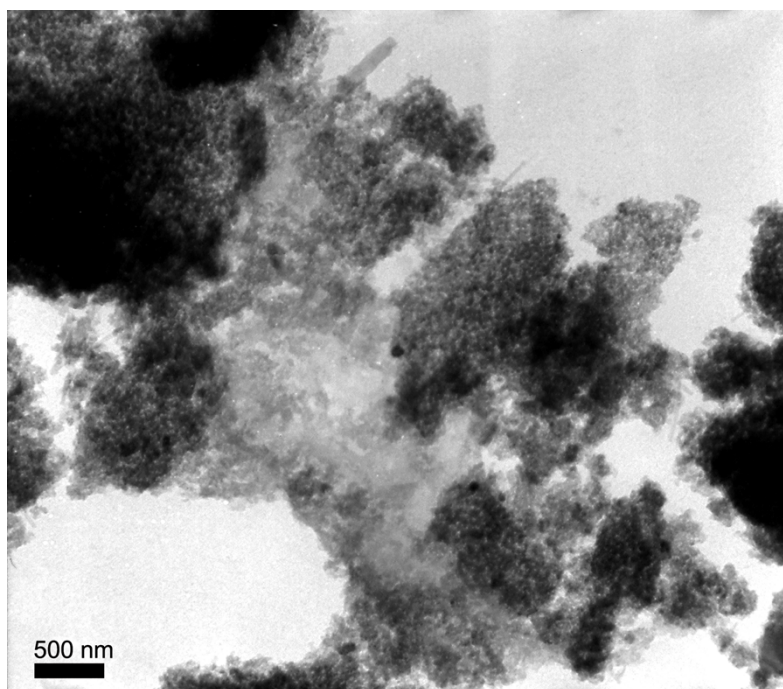

**Fig. S4** TEM image of Crypt-C400

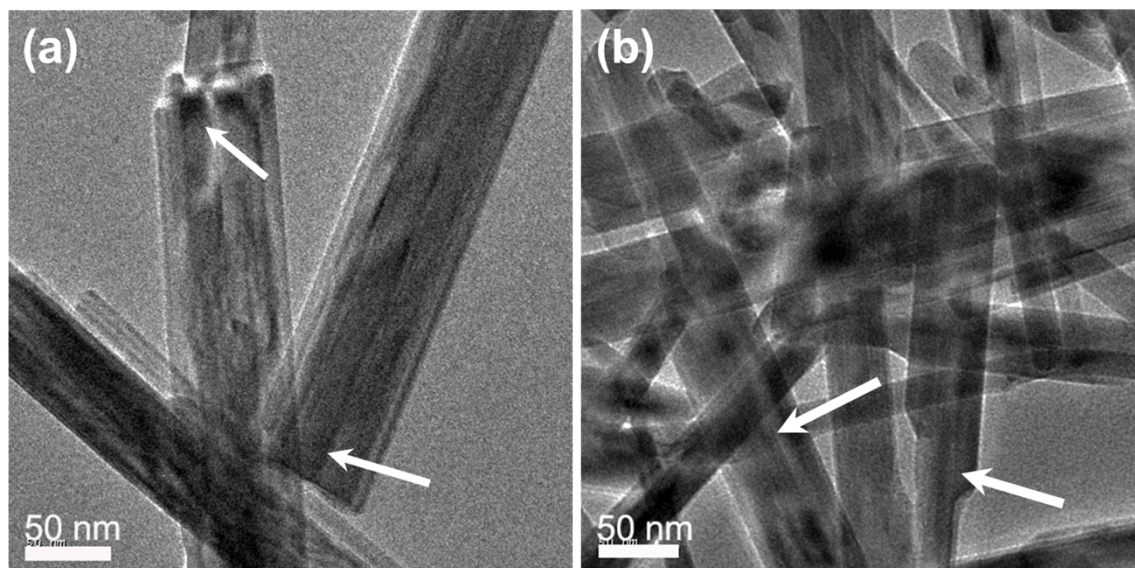

**Fig. S5** TEM images of Crypt-A600

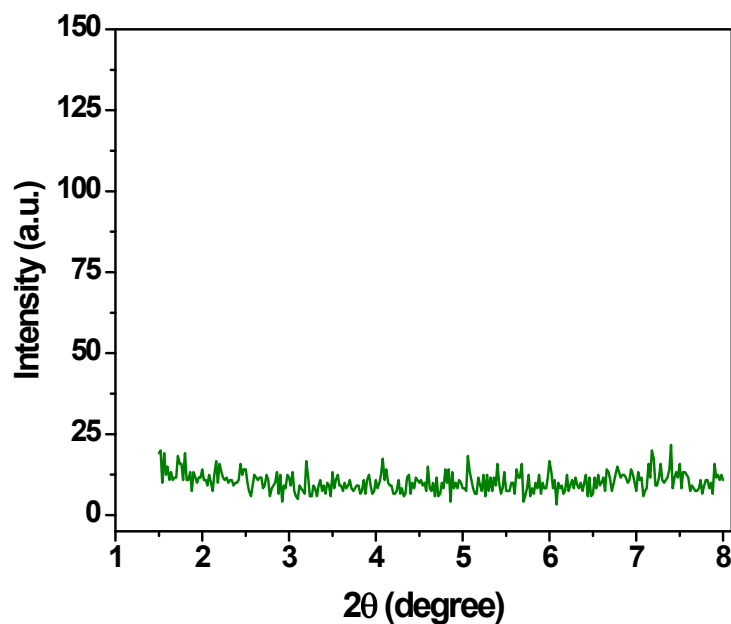

**Fig. S6** Low angle XRD powder pattern of Birn-C. Absence of peak in the low angle XRD pattern reveals the absence of ordered mesoporosity even though mesoporous nature is reflected in the BJH pore size distribution for Birn-C. This proves that the mesoporosity is emerging from the densely-packed nanowires network structure of Birn-C and Crypt-C as confirmed by SEM and TEM results.

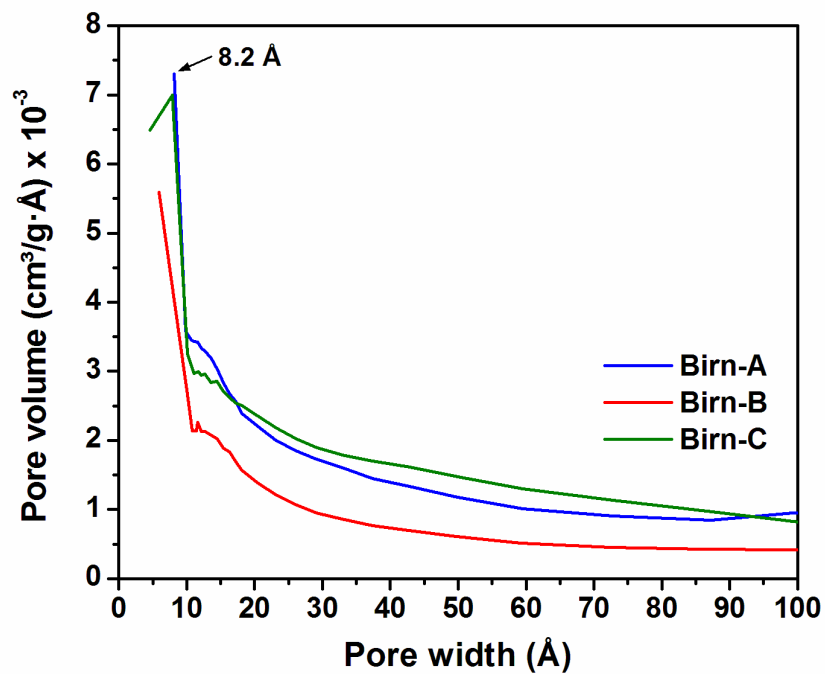

Fig. S7 Horvath-Kawazoe pore size distributions of birnessite samples

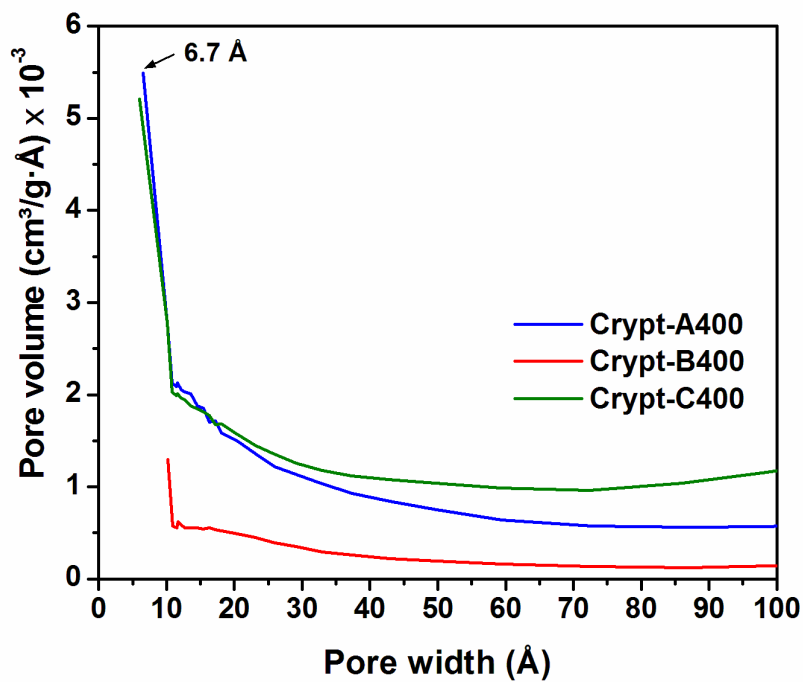

Fig. S8 Horvath-Kawazoe pore size distributions of cryptomelane samples
